# Supplementary material for: The Antimicrobial Resistance (AMR) Rates of Enterobacterales in a Rural Hospital from the Eastern Region, Ghana: A Retrospective Study, 2022
Source: MDPI journal article supplement (doi:10.3390/antibiotics12081321), 2023-08-16
Supplement: s1 [file s1]

### Supplementary Material

**Table S1.** Biochemical tests for microorganism identification performed on specific agar, including urea, citrate, indole, and Triple Sugar Iron (TSI) tests. The combinations shown led to the identification of a specific bacterial genus and species. H<sub>2</sub>S: Hydrogen sulfide gas (Blackening). D: Different strains give different reactions. Y: Yellow colour. R: Red colour.

|                                |       |         |        | TSI MEDIUM |      |                  |     |
|--------------------------------|-------|---------|--------|------------|------|------------------|-----|
| SPECIES                        | Urea  | Citrate | Indole | Slope      | Butt | H <sub>2</sub> S | Gas |
| <i>Escherichia Coli</i>        | -     | -       | +2     | Y6         | Y    | -                | +2  |
| <i>Shigella</i> spp.           | -     | -       | d      | R          | Y    | -                | -3  |
| <i>Salmonella typhi</i>        | -     | -       | -      | R          | Y    | +                | -   |
| <i>Salmonella paratyphi A</i>  | -     | -       | -      | R          | Y    | -                | +   |
| <i>Most other Salmonellae</i>  | -     | +       | -      | R          | Y    | +2               | D   |
| <i>Citrobacter freundii</i>    | D     | +       | -3     | R or Y     | Y    | D                | +   |
| <i>Klebsiella pneumonia</i>    | +slow | +2      | -3     | Y          | Y    | -                | +   |
| <i>Klebsiella oxytoca</i>      | +slow | +2      | +      | Y          | Y    | -                | +   |
| <i>Enterobacter</i> spp.       | -     | +       | -      | Y          | Y    | -                | +   |
| <i>Serratia marcescens</i>     | D     | +       | -      | R or Y     | Y    | -                | D   |
| <i>Proteus vulgaris</i>        | +     | D       | +      | R          | Y    | +                | D   |
| <i>Proteus mirabilis</i>       | +     | +2      | -      | R          | Y    | +                | +   |
| <i>Morganella morganii</i>     | +     | -       | +      | R          | Y    | -                | D   |
| <i>Providencia</i> spp.        | D     | +       | +      | R          | Y    | -                | D   |
| <i>Yersinia enterocolitica</i> | +slow | -       | D      | R          | Y    | -                | -   |
| <i>Vibrio cholera</i>          | -     | D       | +      | R          | Y    | -                | -   |
| <i>Vibrio parahaemolyticus</i> | -3    | D       | +      | R          | Y    | -                | -   |
